# Supplementary material for: Investigation of Genetic Determinants of Glioma Immune Phenotype by Integrative Immunogenomic Scale Analysis
Source: Front Immunol. 2021 Jun 16;12:557994. doi: 10.3389/fimmu.2021.557994 (PMC8242587; doi:10.3389/fimmu.2021.557994)
Supplement: Supplementary file 8 [file Table_7.xlsx]

## Sheet: Sheet1
Supplementary Online File 7. Association between TMB and Survival Data, Glioma Grade, Immune Phenotypes
id	futime	fustat	TMB	Phenotype	TMB Risk	Tumor
TCGA-27-1833-01	737	1	2	Immune-L	High TMB	GBM
TCGA-06-0125-01	1448	1	1.92105	Immune-L	High TMB	GBM
TCGA-06-0216-01	735	1	1.71053	Immune-L	High TMB	GBM
TCGA-76-4932-01	1458	1	1.84211	Immune-L	High TMB	GBM
TCGA-15-1446-01	581	0	1.71053	Immune-L	High TMB	GBM
TCGA-12-0657-01	3	1	1.63158	Immune-L	High TMB	GBM
TCGA-19-5960-01	455	1	1.18421	Immune-L	High TMB	GBM
TCGA-12-0821-01	323	1	1.97368	Immune-L	High TMB	GBM
TCGA-19-5951-01	244	1	2.34211	Immune-L	High TMB	GBM
TCGA-06-0195-01	225	1	2.42105	Immune-L	High TMB	GBM
TCGA-12-3650-01	333	1	1.57895	Immune-L	High TMB	GBM
TCGA-28-5220-01	388	1	1	Immune-L	Low TMB	GBM
TCGA-32-2616-01	224	1	34.7632	Immune-L	High TMB	GBM
TCGA-12-3653-01	442	1	0.710526	Immune-L	Low TMB	GBM
TCGA-06-5856-01	114	1	1.39474	Immune-L	High TMB	GBM
TCGA-06-0188-01	1356	1	1.71053	Immune-L	High TMB	GBM
TCGA-06-0174-01	98	1	2.07895	Immune-L	High TMB	GBM
TCGA-12-0688-01	811	1	1.78947	Immune-L	High TMB	GBM
TCGA-14-1794-01	30	1	3.60526	Immune-L	High TMB	GBM
TCGA-27-1838-01	350	1	2.63158	Immune-L	High TMB	GBM
TCGA-32-1970-01	468	1	2.23684	Immune-L	High TMB	GBM
TCGA-26-5133-01	452	0	0.842105	Immune-L	Low TMB	GBM
TCGA-19-2631-01	213	1	2.52632	Immune-L	High TMB	GBM
TCGA-14-0866-01	801	1	5.71053	Immune-L	High TMB	GBM
TCGA-19-2621-01	33	1	2.94737	Immune-L	High TMB	GBM
TCGA-12-0707-01	864	1	2.02632	Immune-L	High TMB	GBM
TCGA-06-0171-01	399	1	1.47368	Immune-L	High TMB	GBM
TCGA-32-4719-01	330	1	1.44737	Immune-L	High TMB	GBM
TCGA-28-1757-01	4	0	3.05263	Immune-L	High TMB	GBM
TCGA-06-2562-01	382	1	1.97368	Immune-L	High TMB	GBM
TCGA-19-1386-01	276	1	1.89474	Immune-L	High TMB	GBM
TCGA-19-1786-01	218	0	1.55263	Immune-L	High TMB	GBM
TCGA-08-0386-01	548	1	0.236842	Immune-L	Low TMB	GBM
TCGA-28-1749-01	280	0	1.26316	Immune-L	High TMB	GBM
TCGA-27-1836-01	914	1	1.31579	Immune-L	High TMB	GBM
TCGA-26-5132-01	286	0	1.60526	Immune-L	High TMB	GBM
TCGA-12-0692-01	111	1	1.76316	Immune-L	High TMB	GBM
TCGA-06-0241-01	1481	1	1.92105	Immune-L	High TMB	GBM
TCGA-19-5958-01	428	1	1.39474	Immune-L	High TMB	GBM
TCGA-19-2625-01	124	1	1.60526	Immune-L	High TMB	GBM
TCGA-06-2565-01	506	1	1.5	Immune-L	High TMB	GBM
TCGA-02-2485-01	470	0	1.94737	Immune-L	High TMB	GBM
TCGA-12-0656-01	2883	1	1.39474	Immune-L	High TMB	GBM
TCGA-12-1597-01	675	1	1.94737	Immune-L	High TMB	GBM
TCGA-06-5415-01	260	0	1.52632	Immune-L	High TMB	GBM
TCGA-06-0157-01	97	1	1.68421	Immune-L	High TMB	GBM
TCGA-14-2554-01	532	1	2.18421	Immune-L	High TMB	GBM
TCGA-14-1453-01	35	1	1.76316	Immune-L	High TMB	GBM
TCGA-06-0173-01	136	1	2.07895	Immune-L	High TMB	GBM
TCGA-28-5219-01	690	0	1.47368	Immune-L	High TMB	GBM
TCGA-32-5222-01	585	1	2.15789	Immune-L	High TMB	GBM
TCGA-76-6191-01	508	1	1.81579	Immune-L	High TMB	GBM
TCGA-14-0787-01	68	1	1.34211	Immune-L	High TMB	GBM
TCGA-12-0618-01	395	1	1.21053	Immune-L	High TMB	GBM
TCGA-26-1799-01	285	1	1.36842	Immune-L	High TMB	GBM
TCGA-14-1827-01	179	1	1.42105	Immune-L	High TMB	GBM
TCGA-19-1791-01	4	0	1.89474	Immune-L	High TMB	GBM
TCGA-06-0875-01	1322	0	2.13158	Immune-L	High TMB	GBM
TCGA-06-0877-01	204	0	2.28947	Immune-L	High TMB	GBM
TCGA-19-2620-01	148	1	1.97368	Immune-L	High TMB	GBM
TCGA-14-4157-01	104	0	0.947368	Immune-L	Low TMB	GBM
TCGA-02-2466-01	511	1	2.39474	Immune-L	High TMB	GBM
TCGA-15-0742-01	419	1	2.02632	Immune-L	High TMB	GBM
TCGA-27-2528-01	480	1	1.52632	Immune-L	High TMB	GBM
TCGA-19-5950-01	523	1	1.71053	Immune-L	High TMB	GBM
TCGA-32-4210-01	113	1	2.13158	Immune-L	High TMB	GBM
TCGA-06-0187-01	828	1	1.31579	Immune-L	High TMB	GBM
TCGA-16-0861-01	131	0	1.78947	Immune-L	High TMB	GBM
TCGA-16-1460-01	195	0	1.60526	Immune-L	High TMB	GBM
TCGA-06-0137-01	812	1	2.36842	Immune-L	High TMB	GBM
TCGA-28-2506-01	205	0	2.34211	Immune-L	High TMB	GBM
TCGA-14-0867-01	62	1	1.84211	Immune-L	High TMB	GBM
TCGA-06-0744-01	1426	1	2.21053	Immune-L	High TMB	GBM
TCGA-27-2518-01	753	1	1.5	Immune-L	High TMB	GBM
TCGA-19-2624-01	5	1	1.18421	Immune-L	High TMB	GBM
TCGA-12-1089-01	177	1	1.89474	Immune-L	High TMB	GBM
TCGA-06-5858-01	187	0	5.81579	Immune-L	High TMB	GBM
TCGA-28-1746-01	6	0	2.10526	Immune-L	High TMB	GBM
TCGA-27-2521-01	510	1	1.39474	Immune-L	High TMB	GBM
TCGA-26-1442-01	953	0	1	Immune-L	Low TMB	GBM
TCGA-06-2564-01	181	0	1.89474	Immune-L	High TMB	GBM
TCGA-41-2571-01	26	1	1.55263	Immune-L	High TMB	GBM
TCGA-12-0773-01	1315	1	1.28947	Immune-L	High TMB	GBM
TCGA-41-2575-01	290	1	2.02632	Immune-L	High TMB	GBM
TCGA-28-5218-01	157	1	0.578947	Immune-L	Low TMB	GBM
TCGA-14-0786-01	701	1	1.18421	Immune-L	High TMB	GBM
TCGA-14-1795-01	60	1	6.63158	Immune-L	High TMB	GBM
TCGA-06-5414-01	273	0	0.973684	Immune-L	Low TMB	GBM
TCGA-06-5411-01	254	1	0.973684	Immune-L	Low TMB	GBM
TCGA-06-0211-01	360	1	2.05263	Immune-L	High TMB	GBM
TCGA-19-1788-01	112	1	2.31579	Immune-L	High TMB	GBM
TCGA-12-0826-01	845	1	1.23684	Immune-L	High TMB	GBM
TCGA-12-0828-01	272	1	1.86842	Immune-L	High TMB	GBM
TCGA-06-0126-01	211	1	1.76316	Immune-L	High TMB	GBM
TCGA-81-5910-01	49	1	1.36842	Immune-L	High TMB	GBM
TCGA-14-1456-01	1246	0	0.552632	Immune-L	Low TMB	GBM
TCGA-32-2615-01	485	1	1.02632	Immune-L	Low TMB	GBM
TCGA-02-2483-01	466	0	1.07895	Immune-L	Low TMB	GBM
TCGA-06-5417-01	155	0	1.71053	Immune-L	High TMB	GBM
TCGA-06-6391-01	45	1	1.92105	Immune-L	High TMB	GBM
TCGA-12-1600-01	448	1	2.15789	Immune-L	High TMB	GBM
TCGA-19-2619-01	294	0	1.71053	Immune-L	High TMB	GBM
TCGA-06-0648-01	298	1	1.94737	Immune-L	High TMB	GBM
TCGA-28-5204-01	454	1	1.34211	Immune-L	High TMB	GBM
TCGA-06-0745-01	239	1	1.60526	Immune-L	High TMB	GBM
TCGA-06-1804-01	414	1	2.5	Immune-L	High TMB	GBM
TCGA-76-4931-01	279	1	1.5	Immune-L	High TMB	GBM
TCGA-12-0819-01	754	1	1.23684	Immune-L	High TMB	GBM
TCGA-28-6450-01	165	1	1.57895	Immune-L	High TMB	GBM
TCGA-19-1390-01	772	1	3.63158	Immune-L	High TMB	GBM
TCGA-06-0686-01	432	1	1.63158	Immune-L	High TMB	GBM
TCGA-06-2558-01	380	1	1.94737	Immune-L	High TMB	GBM
TCGA-06-0185-01	2246	0	1.71053	Immune-L	High TMB	GBM
TCGA-06-2570-01	958	0	0.921053	Immune-L	Low TMB	GBM
TCGA-12-3646-01	1339	1	2.02632	Immune-L	High TMB	GBM
TCGA-19-5954-01	368	1	2.5	Immune-L	High TMB	GBM
TCGA-06-0743-01	803	1	2.97368	Immune-L	High TMB	GBM
TCGA-87-5896-01	800	0	1.73684	Immune-L	High TMB	GBM
TCGA-06-1087-01	123	1	1.44737	Immune-L	High TMB	GBM
TCGA-41-2573-01	272	0	1.26316	Immune-L	High TMB	GBM
TCGA-06-2569-01	13	0	0.921053	Immune-L	Low TMB	GBM
TCGA-19-0957-01	666	1	2.81579	Immune-L	High TMB	GBM
TCGA-14-0865-01	502	1	1.52632	Immune-L	High TMB	GBM
TCGA-76-4925-01	146	1	0.342105	Immune-L	Low TMB	GBM
TCGA-14-1396-01	34	1	4.60526	Immune-L	High TMB	GBM
TCGA-12-3649-01	463	1	2.31579	Immune-L	High TMB	GBM
TCGA-14-0790-01	419	1	2.15789	Immune-L	High TMB	GBM
TCGA-28-2514-01	160	0	1.65789	Immune-L	High TMB	GBM
TCGA-06-0879-01	1229	1	1.81579	Immune-L	High TMB	GBM
TCGA-14-0871-01	880	1	1.47368	Immune-L	High TMB	GBM
TCGA-28-2510-01			0.578947	Immune-L	Low TMB	GBM
TCGA-41-5651-01	460	1	2.65789	Immune-L	High TMB	GBM
TCGA-76-6192-01	100	1	1.5	Immune-L	High TMB	GBM
TCGA-28-5216-01	415	0	1.5	Immune-L	High TMB	GBM
TCGA-06-0142-01	67	1	0.0789474	Immune-L	Low TMB	GBM
TCGA-19-1789-01	99	1	1.89474	Immune-L	High TMB	GBM
TCGA-41-3392-01	30	1	1.86842	Immune-L	High TMB	GBM
TCGA-27-1835-01	648	1	2.02632	Immune-L	High TMB	GBM
TCGA-06-0882-01	632	1	1.05263	Immune-L	Low TMB	GBM
TCGA-06-6390-01	164	1	1.23684	Immune-L	High TMB	GBM
TCGA-06-1801-01	360	1	2.92105	Immune-L	High TMB	GBM
TCGA-26-5136-01	577	1	1.60526	Immune-L	High TMB	GBM
TCGA-19-5959-01	511	1	2.71053	Immune-L	High TMB	GBM
TCGA-14-0813-01	41	1	2.84211	Immune-L	High TMB	GBM
TCGA-14-1825-01	232	1	1.65789	Immune-L	High TMB	GBM
TCGA-27-2523-01	489	1	1.65789	Immune-L	High TMB	GBM
TCGA-12-0818-01	2791	1	1.94737	Immune-L	High TMB	GBM
TCGA-12-0820-01	562	1	1.65789	Immune-L	High TMB	GBM
TCGA-06-0646-01	175	1	1.26316	Immune-L	High TMB	GBM
TCGA-32-2634-01	693	0	1.47368	Immune-L	High TMB	GBM
TCGA-12-3651-01	386	1	2.47368	Immune-L	High TMB	GBM
TCGA-32-2495-01	457	1	1.84211	Immune-L	High TMB	GBM
TCGA-12-3652-01	1062	1	2	Immune-L	High TMB	GBM
TCGA-28-1755-01	47	1	2.10526	Immune-L	High TMB	GBM
TCGA-14-3477-01	115	0	1.18421	Immune-L	High TMB	GBM
TCGA-16-0849-01	793	0	1	Immune-L	Low TMB	GBM
TCGA-06-2559-01	150	1	1.71053	Immune-L	High TMB	GBM
TCGA-06-0747-01	82	1	2.34211	Immune-L	High TMB	GBM
TCGA-16-0850-01	498	1	1.73684	Immune-L	High TMB	GBM
TCGA-12-0670-01	790	1	1.84211	Immune-L	High TMB	GBM
TCGA-14-1458-01	203	1	1.71053	Immune-L	High TMB	GBM
TCGA-06-0749-01	82	1	1.65789	Immune-L	High TMB	GBM
TCGA-06-0167-01	347	1	0.0263158	Immune-L	Low TMB	GBM
TCGA-14-1821-01	541	1	0.631579	Immune-L	Low TMB	GBM
TCGA-32-1976-01	15	1	1.81579	Immune-L	High TMB	GBM
TCGA-19-1387-01	181	0	2.36842	Immune-L	High TMB	GBM
TCGA-12-1598-01	476	1	1.55263	Immune-L	High TMB	GBM
TCGA-16-1048-01			1.89474	Immune-L	High TMB	GBM
TCGA-06-5416-01	204	0	458.947	Immune-L	High TMB	GBM
TCGA-19-5956-01	684	1	227.447	Immune-L	High TMB	GBM
TCGA-02-0047-01	448	1	1.81579	Immune-L	High TMB	GBM
TCGA-06-0881-01	504	1	0.105263	Immune-M	Low TMB	GBM
TCGA-27-1831-01	505	1	1.63158	Immune-M	High TMB	GBM
TCGA-06-0238-01	405	1	1.07895	Immune-M	Low TMB	GBM
TCGA-19-1787-01	385	1	22.3684	Immune-M	High TMB	GBM
TCGA-28-1760-01	143	0	3.94737	Immune-M	High TMB	GBM
TCGA-14-0812-01	99	1	1.78947	Immune-M	High TMB	GBM
TCGA-06-5412-01	138	1	1.26316	Immune-M	High TMB	GBM
TCGA-16-1045-01	883	1	2.15789	Immune-M	High TMB	GBM
TCGA-06-0141-01	313	1	0.105263	Immune-M	Low TMB	GBM
TCGA-28-1753-01	37	0	1.42105	Immune-M	High TMB	GBM
TCGA-06-0168-01	598	1	1.36842	Immune-M	High TMB	GBM
TCGA-32-1986-01	386	1	1.52632	Immune-M	High TMB	GBM
TCGA-06-2567-01	133	1	1.86842	Immune-M	High TMB	GBM
TCGA-27-2526-01	87	1	1.47368	Immune-M	High TMB	GBM
TCGA-19-1389-01	141	1	2.76316	Immune-M	High TMB	GBM
TCGA-12-5295-01	454	1	2.21053	Immune-M	High TMB	GBM
TCGA-32-2494-01	632	1	1.73684	Immune-M	High TMB	GBM
TCGA-12-1602-01	206	1	1.21053	Immune-M	High TMB	GBM
TCGA-76-4926-01	138	1	1.78947	Immune-M	High TMB	GBM
TCGA-14-0789-01	342	1	2.31579	Immune-M	High TMB	GBM
TCGA-19-1790-01	154	1	2.44737	Immune-M	High TMB	GBM
TCGA-06-1084-01	728	1	1.60526	Immune-M	High TMB	GBM
TCGA-32-4211-01	383	1	1.57895	Immune-M	High TMB	GBM
TCGA-12-5299-01	98	1	1.26316	Immune-M	High TMB	GBM
TCGA-32-2638-01	766	1	1.81579	Immune-M	High TMB	GBM
TCGA-27-2527-01	438	1	1.47368	Immune-M	High TMB	GBM
TCGA-06-5408-01	357	1	1.28947	Immune-M	High TMB	GBM
TCGA-16-0848-01	535	1	10.2105	Immune-M	High TMB	GBM
TCGA-76-6285-01	254	1	1.92105	Immune-M	High TMB	GBM
TCGA-06-0876-01	1405	0	2.05263	Immune-M	High TMB	GBM
TCGA-06-1802-01	466	1	6.15789	Immune-M	High TMB	GBM
TCGA-06-5410-01	108	1	0.0789474	Immune-M	Low TMB	GBM
TCGA-12-0827-01	1179	1	0.815789	Immune-M	Low TMB	GBM
TCGA-06-0213-01	16	1	1.89474	Immune-M	High TMB	GBM
TCGA-12-1599-01	781	1	1.31579	Immune-M	High TMB	GBM
TCGA-06-0750-01	28	1	1.36842	Immune-M	High TMB	GBM
TCGA-06-5418-01	83	1	1.5	Immune-M	High TMB	GBM
TCGA-06-6389-01	237	0	1	Immune-M	Low TMB	GBM
TCGA-06-0132-01	771	1	0.578947	Immune-M	Low TMB	GBM
TCGA-28-1747-01	77	1	1.26316	Immune-M	High TMB	GBM
TCGA-12-0616-01	448	1	1.23684	Immune-M	High TMB	GBM
TCGA-06-2561-01	537	1	1.02632	Immune-M	Low TMB	GBM
TCGA-06-2563-01	932	0	2.31579	Immune-M	High TMB	GBM
TCGA-06-0219-01	22	1	1.21053	Immune-M	High TMB	GBM
TCGA-14-3476-01	12	1	1.55263	Immune-M	High TMB	GBM
TCGA-06-0145-01	71	1	2.76316	Immune-M	High TMB	GBM
TCGA-76-4934-01	77	1	1.76316	Immune-M	High TMB	GBM
TCGA-32-4209-01	618	1	0.657895	Immune-M	Low TMB	GBM
TCGA-27-2524-01	231	1	1.36842	Immune-M	High TMB	GBM
TCGA-32-4213-01	604	0	1.68421	Immune-M	High TMB	GBM
TCGA-06-0155-01	318	1	2.05263	Immune-M	High TMB	GBM
TCGA-28-2502-01	20	0	1.47368	Immune-M	High TMB	GBM
TCGA-41-4097-01	6	1	1	Immune-M	Low TMB	GBM
TCGA-14-1037-01	587	1	1.52632	Immune-M	High TMB	GBM
TCGA-02-2486-01	618	1	1.84211	Immune-M	High TMB	GBM
TCGA-16-0846-01	119	1	2.07895	Immune-M	High TMB	GBM
TCGA-06-0221-01	603	1	0.631579	Immune-M	Low TMB	GBM
TCGA-32-1980-01	36	1	0.131579	Immune-M	Low TMB	GBM
TCGA-26-5134-01	167	0	1.68421	Immune-M	High TMB	GBM
TCGA-06-0169-01	100	1	1.65789	Immune-M	High TMB	GBM
TCGA-06-0649-01	64	1	2.71053	Immune-M	High TMB	GBM
TCGA-76-4929-01	111	1	1.92105	Immune-M	High TMB	GBM
TCGA-14-0736-01	460	1	1.71053	Immune-M	High TMB	GBM
TCGA-32-2632-01	269	1	2.71053	Immune-M	High TMB	GBM
TCGA-14-1455-01	28	1	1.81579	Immune-M	High TMB	GBM
TCGA-19-5955-01	54	1	1.86842	Immune-M	High TMB	GBM
TCGA-06-0645-01	175	1	1.57895	Immune-M	High TMB	GBM
TCGA-12-0775-01	232	1	2.97368	Immune-M	High TMB	GBM
TCGA-06-0140-01	6	1	1.42105	Immune-M	High TMB	GBM
TCGA-12-0822-01	715	1	1.26316	Immune-M	High TMB	GBM
TCGA-76-6193-01	82	1	1.28947	Immune-M	High TMB	GBM
TCGA-27-1832-01	300	1	1.10526	Immune-M	Low TMB	GBM
TCGA-06-1800-01	815	1	1.84211	Immune-M	High TMB	GBM
TCGA-76-4935-01	1121	1	1.36842	Immune-M	High TMB	GBM
TCGA-32-4208-01	643	0	0.789474	Immune-M	Low TMB	GBM
TCGA-14-1829-01	218	0	1.60526	Immune-M	High TMB	GBM
TCGA-06-0122-01	620	1	2.55263	Immune-M	High TMB	GBM
TCGA-41-3393-01	135	1	2.34211	Immune-M	High TMB	GBM
TCGA-27-1834-01	1233	1	1.63158	Immune-M	High TMB	GBM
TCGA-06-0154-01	424	1	1.76316	Immune-M	High TMB	GBM
TCGA-06-0190-01	317	1	1.65789	Immune-M	High TMB	GBM
TCGA-06-0158-01	329	1	1.65789	Immune-M	High TMB	GBM
TCGA-14-0817-01	164	1	2	Immune-M	High TMB	GBM
TCGA-12-1088-01	3881	1	1.63158	Immune-M	High TMB	GBM
TCGA-06-0128-01	691	1	1.36842	Immune-M	High TMB	GBM
TCGA-26-1439-01	422	1	1.23684	Immune-M	High TMB	GBM
TCGA-14-1823-01	543	1	1.31579	Immune-M	High TMB	GBM
TCGA-06-0237-01	415	1	1.13158	Immune-M	Low TMB	GBM
TCGA-19-1385-01	327	1	2.07895	Immune-M	High TMB	GBM
TCGA-76-4928-01	94	1	2.13158	Immune-M	High TMB	GBM
TCGA-19-2623-01	229	0	2.39474	Immune-M	High TMB	GBM
TCGA-06-0192-01	1185	1	1.92105	Immune-M	High TMB	GBM
TCGA-28-1750-01	254	0	1.36842	Immune-M	High TMB	GBM
TCGA-06-0644-01	384	1	1.76316	Immune-M	High TMB	GBM
TCGA-76-6282-01	519	1	1.23684	Immune-M	High TMB	GBM
TCGA-02-2470-01	393	1	1.68421	Immune-M	High TMB	GBM
TCGA-06-0214-01	457	1	1.78947	Immune-M	High TMB	GBM
TCGA-32-1979-01	593	1	2.23684	Immune-M	High TMB	GBM
TCGA-06-0166-01	178	1	1.05263	Immune-M	Low TMB	GBM
TCGA-06-0189-01	469	1	0.184211	Immune-M	Low TMB	GBM
TCGA-12-0778-01	454	1	4.86842	Immune-M	High TMB	GBM
TCGA-28-1752-01	258	0	1.52632	Immune-M	High TMB	GBM
TCGA-06-5859-01	139	0	1.36842	Immune-M	High TMB	GBM
TCGA-12-1093-01	486	1	1.34211	Immune-M	High TMB	GBM
TCGA-12-0619-01	1062	1	1.65789	Immune-M	High TMB	GBM
TCGA-32-1977-01	3	0	2.28947	Immune-M	High TMB	GBM
TCGA-32-1991-01	515	1	1.34211	Immune-M	High TMB	GBM
TCGA-06-0210-01	225	1	1.86842	Immune-M	High TMB	GBM
TCGA-32-1982-01	142	1	2.42105	Immune-M	High TMB	GBM
TCGA-26-5135-01	270	1	1.89474	Immune-M	High TMB	GBM
TCGA-06-0939-01	814	1	2.13158	Immune-M	High TMB	GBM
TCGA-06-2557-01	33	1	1.63158	Immune-M	High TMB	GBM
TCGA-06-0124-01	1448	1	1.76316	Immune-M	High TMB	GBM
TCGA-28-2509-01	145	0	1.78947	Immune-M	High TMB	GBM
TCGA-06-1805-01	1031	0	2.65789	Immune-M	High TMB	GBM
TCGA-19-2629-01	737	1	2.68421	Immune-M	High TMB	GBM
TCGA-06-5413-01	268	0	1.5	Immune-M	High TMB	GBM
TCGA-19-5947-01	202	1	0.815789	Immune-M	Low TMB	GBM
TCGA-41-3915-01	360	1	1.05263	Immune-M	Low TMB	GBM
TCGA-19-1388-01	394	1	2.26316	Immune-M	High TMB	GBM
TCGA-14-1034-01	485	1	2.47368	Immune-M	High TMB	GBM
TCGA-06-2566-01	182	1	2.34211	Immune-M	High TMB	GBM
TCGA-06-0650-01	717	1	0.815789	Immune-M	Low TMB	GBM
TCGA-19-5952-01	575	1	1.31579	Immune-M	High TMB	GBM
TCGA-28-2513-01	222	0	1.97368	Immune-M	High TMB	GBM
TCGA-28-1751-01	232	0	1.52632	Immune-M	High TMB	GBM
TCGA-27-1830-01	154	1	1.18421	Immune-M	High TMB	GBM
TCGA-06-0184-01	2126	1	1.57895	Immune-M	High TMB	GBM
TCGA-06-0152-01	375	1	1.92105	Immune-M	High TMB	GBM
TCGA-76-4927-01	535	1	1.60526	Immune-M	High TMB	GBM
TCGA-12-3648-01	819	1	1.60526	Immune-M	High TMB	GBM
TCGA-41-2572-01	406	1	1.57895	Immune-M	High TMB	GBM
TCGA-19-4068-01	137	0	1.76316	Immune-M	High TMB	GBM
TCGA-12-3644-01	1818	1	2.23684	Immune-M	High TMB	GBM
TCGA-12-0829-01	626	1	8.10526	Immune-M	High TMB	GBM
TCGA-28-2501-01			1.36842	Immune-M	High TMB	GBM
TCGA-14-1451-01	703	1	0.815789	Immune-M	Low TMB	GBM
TCGA-12-5301-01	62	1	2.07895	Immune-M	High TMB	GBM
TCGA-27-2519-01	550	1	1.18421	Immune-M	High TMB	GBM
TCGA-06-0878-01	218	0	1.36842	Immune-M	High TMB	GBM
TCGA-12-1092-01	661	1	1.15789	Immune-M	High TMB	GBM
TCGA-27-1837-01	427	1	1.18421	Immune-M	High TMB	GBM
TCGA-28-1745-01	345	0	0.947368	Immune-M	Low TMB	GBM
TCGA-32-2491-01	372	1	1.89474	Immune-M	High TMB	GBM
TCGA-14-0781-01	29	1	0.657895	Immune-M	Low TMB	GBM
TCGA-06-0129-01	1024	1	1.23684	Immune-M	High TMB	GBM
TCGA-28-5213-01	951	0	1.57895	Immune-M	High TMB	GBM
TCGA-28-5208-01	544	1	1.89474	Immune-M	High TMB	GBM
TCGA-28-5215-01	335	1	1.13158	Immune-M	Low TMB	GBM
TCGA-28-5209-01	442	0	2.73684	Immune-M	High TMB	GBM
TCGA-02-0033-01	86	1	1	Immune-M	Low TMB	GBM
TCGA-26-5139-01	48	0	1.42105	Immune-M	High TMB	GBM
TCGA-28-5214-01	713	1	1.21053	Immune-M	High TMB	GBM
TCGA-02-0003-01	144	1	1.42105	Immune-M	High TMB	GBM
TCGA-28-5207-01	343	1	1.5	Immune-M	High TMB	GBM
TCGA-06-0130-01	394	1	0.842105	Immune-M	Low TMB	GBM
TCGA-76-4926-01	138	1	1.78947	Immune-L	High TMB	GBM
TCGA-14-0817-01	164	1	2	Immune-L	High TMB	GBM
TCGA-12-0616-01	448	1	1.23684	Immune-L	High TMB	GBM
TCGA-06-0184-01	2126	1	1.57895	Immune-L	High TMB	GBM
TCGA-27-2519-01	550	1	1.18421	Immune-L	High TMB	GBM
TCGA-02-0047-01	448	1	1.81579	Immune-L	High TMB	GBM
TCGA-15-0742-01	419	1	2.02632	Immune-L	High TMB	GBM
TCGA-12-1597-01	675	1	1.94737	Immune-L	High TMB	GBM
TCGA-06-0211-01	360	1	2.05263	Immune-L	High TMB	GBM
TCGA-26-5136-01	577	1	1.60526	Immune-L	High TMB	GBM
TCGA-06-0882-01	632	1	1.05263	Immune-L	Low TMB	GBM
TCGA-12-3652-01	1062	1	2	Immune-L	High TMB	GBM
TCGA-28-2499-01	95	0	0.868421	Immune-L	Low TMB	GBM
TCGA-28-1747-01	77	1	1.26316	Immune-L	High TMB	GBM
TCGA-19-1390-01	772	1	3.63158	Immune-L	High TMB	GBM
TCGA-06-0646-01	175	1	1.26316	Immune-L	High TMB	GBM
TCGA-28-5209-01	442	0	2.73684	Immune-L	High TMB	GBM
TCGA-06-5856-01	114	1	1.39474	Immune-L	High TMB	GBM
TCGA-16-0846-01	119	1	2.07895	Immune-L	High TMB	GBM
TCGA-06-0649-01	64	1	2.71053	Immune-L	High TMB	GBM
TCGA-06-0125-01	1448	1	1.92105	Immune-L	High TMB	GBM
TCGA-06-5858-01	187	0	5.81579	Immune-L	High TMB	GBM
TCGA-26-1442-01	953	0	1	Immune-L	Low TMB	GBM
TCGA-06-5859-01	139	0	1.36842	Immune-L	High TMB	GBM
TCGA-02-2483-01	466	0	1.07895	Immune-L	Low TMB	GBM
TCGA-28-5204-01	454	1	1.34211	Immune-L	High TMB	GBM
TCGA-06-0157-01	97	1	1.68421	Immune-L	High TMB	GBM
TCGA-32-1980-01	36	1	0.131579	Immune-L	Low TMB	GBM
TCGA-06-0158-01	329	1	1.65789	Immune-L	High TMB	GBM
TCGA-12-0821-01	323	1	1.97368	Immune-L	High TMB	GBM
TCGA-06-5411-01	254	1	0.973684	Immune-L	Low TMB	GBM
TCGA-28-5213-01	951	0	1.57895	Immune-L	High TMB	GBM
TCGA-76-4931-01	279	1	1.5	Immune-L	High TMB	GBM
TCGA-27-2523-01	489	1	1.65789	Immune-L	High TMB	GBM
TCGA-19-2624-01	5	1	1.18421	Immune-L	High TMB	GBM
TCGA-14-1825-01	232	1	1.65789	Immune-L	High TMB	GBM
TCGA-41-2572-01	406	1	1.57895	Immune-L	High TMB	GBM
TCGA-32-1970-01	468	1	2.23684	Immune-L	High TMB	GBM
TCGA-14-0871-01	880	1	1.47368	Immune-L	High TMB	GBM
TCGA-26-5135-01	270	1	1.89474	Immune-L	High TMB	GBM
TCGA-06-2558-01	380	1	1.94737	Immune-L	High TMB	GBM
TCGA-76-4927-01	535	1	1.60526	Immune-L	High TMB	GBM
TCGA-28-5220-01	388	1	1	Immune-L	Low TMB	GBM
TCGA-27-2521-01	510	1	1.39474	Immune-L	High TMB	GBM
TCGA-06-0129-01	1024	1	1.23684	Immune-L	High TMB	GBM
TCGA-14-1823-01	543	1	1.31579	Immune-L	High TMB	GBM
TCGA-27-2528-01	480	1	1.52632	Immune-L	High TMB	GBM
TCGA-06-0174-01	98	1	2.07895	Immune-L	High TMB	GBM
TCGA-27-2524-01	231	1	1.36842	Immune-L	High TMB	GBM
TCGA-14-0790-01	419	1	2.15789	Immune-L	High TMB	GBM
TCGA-06-2570-01	958	0	0.921053	Immune-L	Low TMB	GBM
TCGA-32-2634-01	693	0	1.47368	Immune-L	High TMB	GBM
TCGA-06-0219-01	22	1	1.21053	Immune-L	High TMB	GBM
TCGA-06-2563-01	932	0	2.31579	Immune-L	High TMB	GBM
TCGA-12-0618-01	395	1	1.21053	Immune-L	High TMB	GBM
TCGA-19-1787-01	385	1	22.3684	Immune-L	High TMB	GBM
TCGA-32-2638-01	766	1	1.81579	Immune-L	High TMB	GBM
TCGA-28-5215-01	335	1	1.13158	Immune-L	Low TMB	GBM
TCGA-06-5417-01	155	0	1.71053	Immune-L	High TMB	GBM
TCGA-76-4925-01	146	1	0.342105	Immune-L	Low TMB	GBM
TCGA-28-5207-01	343	1	1.5	Immune-L	High TMB	GBM
TCGA-06-0686-01	432	1	1.63158	Immune-L	High TMB	GBM
TCGA-28-5216-01	415	0	1.5	Immune-L	High TMB	GBM
TCGA-12-3653-01	442	1	0.710526	Immune-L	Low TMB	GBM
TCGA-76-4928-01	94	1	2.13158	Immune-L	High TMB	GBM
TCGA-06-2561-01	537	1	1.02632	Immune-L	Low TMB	GBM
TCGA-14-1034-01	485	1	2.47368	Immune-L	High TMB	GBM
TCGA-12-5295-01	454	1	2.21053	Immune-L	High TMB	GBM
TCGA-41-2571-01	26	1	1.55263	Immune-L	High TMB	GBM
TCGA-26-5133-01	452	0	0.842105	Immune-L	Low TMB	GBM
TCGA-06-1804-01	414	1	2.5	Immune-L	High TMB	GBM
TCGA-06-5414-01	273	0	0.973684	Immune-L	Low TMB	GBM
TCGA-28-5208-01	544	1	1.89474	Immune-L	High TMB	GBM
TCGA-06-2569-01	13	0	0.921053	Immune-L	Low TMB	GBM
TCGA-06-0210-01	225	1	1.86842	Immune-L	High TMB	GBM
TCGA-41-5651-01	460	1	2.65789	Immune-L	High TMB	GBM
TCGA-28-2514-01	160	0	1.65789	Immune-L	High TMB	GBM
TCGA-19-2619-01	294	0	1.71053	Immune-L	High TMB	GBM
TCGA-06-0743-01	803	1	2.97368	Immune-L	High TMB	GBM
TCGA-19-2620-01	148	1	1.97368	Immune-L	High TMB	GBM
TCGA-06-2565-01	506	1	1.5	Immune-L	High TMB	GBM
TCGA-06-0744-01	1426	1	2.21053	Immune-L	High TMB	GBM
TCGA-27-1837-01	427	1	1.18421	Immune-L	High TMB	GBM
TCGA-32-2615-01	485	1	1.02632	Immune-L	Low TMB	GBM
TCGA-32-2616-01	224	1	34.7632	Immune-L	High TMB	GBM
TCGA-12-0619-01	1062	1	1.65789	Immune-L	High TMB	GBM
TCGA-06-2567-01	133	1	1.86842	Immune-L	High TMB	GBM
TCGA-26-5132-01	286	0	1.60526	Immune-L	High TMB	GBM
TCGA-19-2625-01	124	1	1.60526	Immune-L	High TMB	GBM
TCGA-27-1832-01	300	1	1.10526	Immune-L	Low TMB	GBM
TCGA-19-5960-01	455	1	1.18421	Immune-L	High TMB	GBM
TCGA-12-3650-01	333	1	1.57895	Immune-L	High TMB	GBM
TCGA-06-2562-01	382	1	1.97368	Immune-L	High TMB	GBM
TCGA-14-0781-01	29	1	0.657895	Immune-L	Low TMB	GBM
TCGA-06-2564-01	181	0	1.89474	Immune-L	High TMB	GBM
TCGA-26-5134-01	167	0	1.68421	Immune-L	High TMB	GBM
TCGA-76-4932-01	1458	1	1.84211	Immune-L	High TMB	GBM
TCGA-27-1831-01	505	1	1.63158	Immune-L	High TMB	GBM
TCGA-32-2632-01	269	1	2.71053	Immune-L	High TMB	GBM
TCGA-06-5408-01	357	1	1.28947	Immune-L	High TMB	GBM
TCGA-32-1982-01	142	1	2.42105	Immune-L	High TMB	GBM
TCGA-06-0749-01	82	1	1.65789	Immune-L	High TMB	GBM
TCGA-41-3915-01	360	1	1.05263	Immune-L	Low TMB	GBM
TCGA-02-2485-01	470	0	1.94737	Immune-L	High TMB	GBM
TCGA-06-0878-01	218	0	1.36842	Immune-L	High TMB	GBM
TCGA-27-1834-01	1233	1	1.63158	Immune-L	High TMB	GBM
TCGA-32-5222-01	585	1	2.15789	Immune-L	High TMB	GBM
TCGA-14-1829-01	218	0	1.60526	Immune-L	High TMB	GBM
TCGA-06-5416-01	204	0	458.947	Immune-L	High TMB	GBM
TCGA-19-2629-01	737	1	2.68421	Immune-L	High TMB	GBM
TCGA-12-5299-01	98	1	1.26316	Immune-L	High TMB	GBM
TCGA-06-0187-01	828	1	1.31579	Immune-L	High TMB	GBM
TCGA-76-4929-01	111	1	1.92105	Immune-L	High TMB	GBM
TCGA-06-0745-01	239	1	1.60526	Immune-L	High TMB	GBM
TCGA-06-2559-01	150	1	1.71053	Immune-L	High TMB	GBM
TCGA-06-0747-01	82	1	2.34211	Immune-L	High TMB	GBM
TCGA-14-2554-01	532	1	2.18421	Immune-L	High TMB	GBM
TCGA-06-5418-01	83	1	1.5	Immune-L	High TMB	GBM
TCGA-06-5412-01	138	1	1.26316	Immune-L	High TMB	GBM
TCGA-27-1835-01	648	1	2.02632	Immune-L	High TMB	GBM
TCGA-14-0787-01	68	1	1.34211	Immune-L	High TMB	GBM
TCGA-28-2510-01			0.578947	Immune-L	Low TMB	GBM
TCGA-08-0386-01	548	1	0.236842	Immune-L	Low TMB	GBM
TCGA-06-0750-01	28	1	1.36842	Immune-M	High TMB	GBM
TCGA-19-4065-01	214	0	1.44737	Immune-M	High TMB	GBM
TCGA-02-0055-01	76	1	1.78947	Immune-M	High TMB	GBM
TCGA-16-1045-01	883	1	2.15789	Immune-M	High TMB	GBM
TCGA-06-2557-01	33	1	1.63158	Immune-M	High TMB	GBM
TCGA-32-4213-01	604	0	1.68421	Immune-M	High TMB	GBM
TCGA-27-2526-01	87	1	1.47368	Immune-M	High TMB	GBM
TCGA-28-2513-01	222	0	1.97368	Immune-M	High TMB	GBM
TCGA-14-0789-01	342	1	2.31579	Immune-M	High TMB	GBM
TCGA-06-0168-01	598	1	1.36842	Immune-M	High TMB	GBM
TCGA-28-5218-01	157	1	0.578947	Immune-M	Low TMB	GBM
TCGA-06-0645-01	175	1	1.57895	Immune-M	High TMB	GBM
TCGA-06-5413-01	268	0	1.5	Immune-M	High TMB	GBM
TCGA-06-0211-01	360	1	2.05263	Immune-M	High TMB	GBM
TCGA-06-0238-01	405	1	1.07895	Immune-M	Low TMB	GBM
TCGA-41-4097-01	6	1	1	Immune-M	Low TMB	GBM
TCGA-06-0130-01	394	1	0.842105	Immune-M	Low TMB	GBM
TCGA-06-5410-01	108	1	0.0789474	Immune-M	Low TMB	GBM
TCGA-28-1753-01	37	0	1.42105	Immune-M	High TMB	GBM
TCGA-06-0132-01	771	1	0.578947	Immune-M	Low TMB	GBM
TCGA-06-0141-01	313	1	0.105263	Immune-M	Low TMB	GBM
TCGA-06-0190-01	317	1	1.65789	Immune-M	High TMB	GBM
TCGA-06-0644-01	384	1	1.76316	Immune-M	High TMB	GBM
TCGA-26-5139-01	48	0	1.42105	Immune-M	High TMB	GBM
TCGA-27-1830-01	154	1	1.18421	Immune-M	High TMB	GBM
TCGA-02-2486-01	618	1	1.84211	Immune-M	High TMB	GBM
TCGA-28-2509-01	145	0	1.78947	Immune-M	High TMB	GBM
